# Supplementary material for: Effect of channel patterning precision on the performances of vertical OECTs
Source: Royal Society of Chemistry journal article supplement (doi:10.1039/d4nr05239k), 2025-01-01
Supplement: d4nr05239k1.pdf [file d4nr05239k1.pdf]

1  
2  
3  
4  
5  
6  
7  
8  
9  
10  
11  
12  
13

## SUPPLEMENTARY INFORMATION

### **Effect of channel patterning precision on the performances of vertical OECTs**

Ruhua Wu <sup>a</sup>, Chufeng Wu <sup>a</sup>, Jinhao Zhou <sup>a</sup>, Liang-Wen Feng <sup>b</sup>, Jianhua Chen <sup>c</sup>, Dan Zhao <sup>\*a</sup>, and Wei Huang <sup>\*a</sup>

a. School of Automation Engineering, University of Electronic Science and Technology of China (UESTC), 611731, Chengdu, China.

b. Key Laboratory of Green Chemistry & Technology, Ministry of Education, College of Chemistry, Sichuan University, Chengdu, 610065, China.

c. Department of Chemical Science and Technology, Yunnan University, Kunming, China.

1 **Supplementary Figures:**

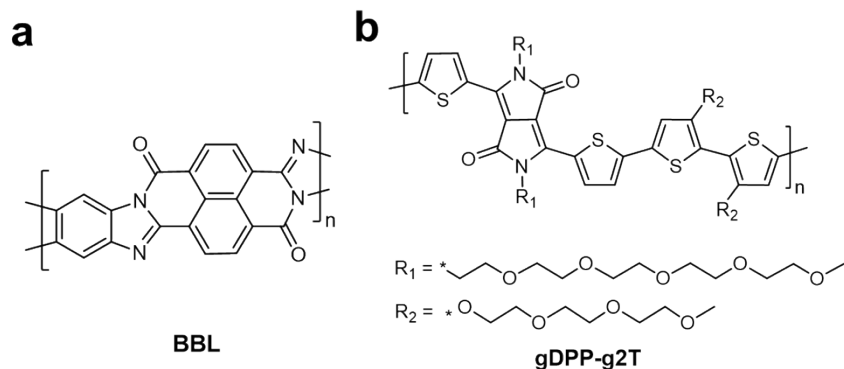

2

3 **Figure S1.** Chemical structures of BBL (a) and gDPP-g2T (b).

4

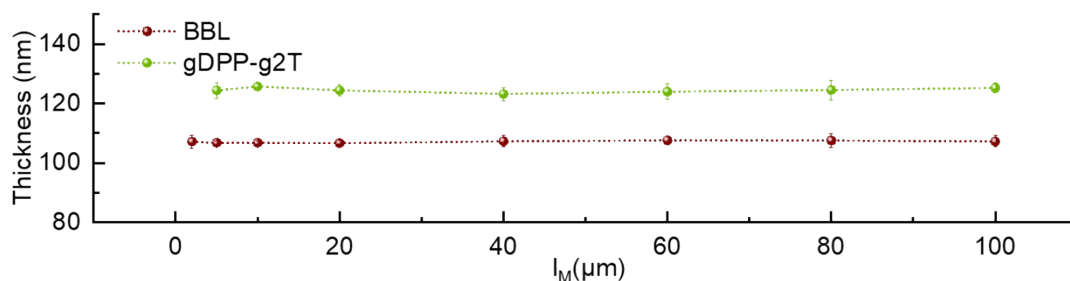

5

6 **Figure S2.** Plot of thickness of BBL and gDPP-g2T thin films with different  
7 patterning precisions (Error bars represent the standard deviation of 3 data points).

8 The BBL and gDPP-g2T films hold average thicknesses of approximately 107 nm and  
9 124 nm, respectively, under various  $l_M$ . Therefore, patterning precision would not  
10 affect the thickness of the OMIECs, and it also indicates that the device performance  
11 variation is due to different  $l_M$ .

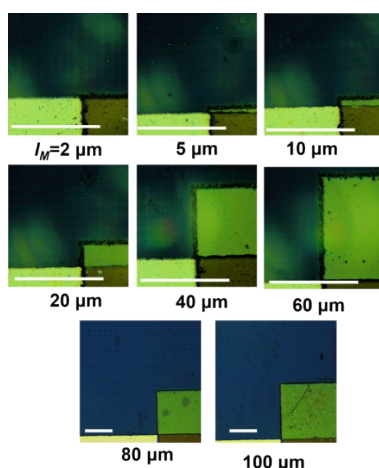

12

13 **Figure S3.** Microscopic images of the BBL thin films with different patterning  
14 precisions. (scale bar =50  $\mu\text{m}$ )

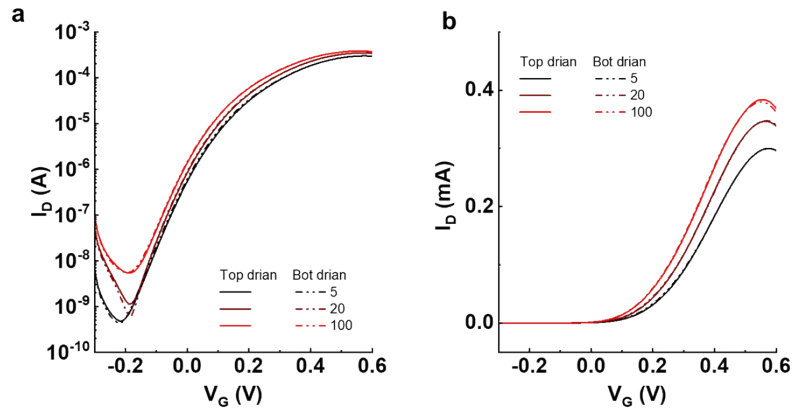

1

2 **Figure S4.** Transfer characteristics in log-scale (a) and linear scale (b) of BBL-based  
 3 vOECTs, where the block and dash curves represent the drain terminal set at the top  
 4 and bottom electrode, respectively.

5

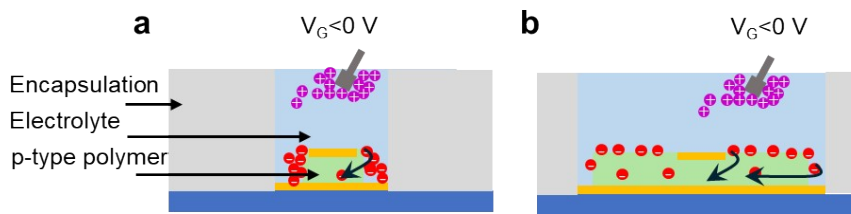

6

7 **Figure S5.** Schematics of comparing ion injection of precise pattern (a) and large  
 8 pattern (b) of a p-type accumulation-mode vOECT.

9 Taking a p-type accumulation-mode vOECT as an example, when the negative gate  
 10 bias gradually increases, the stronger accumulation of ions at the semiconductor-  
 11 electrolyte interface of precisely patterned vOECT may result in stronger Coulombic  
 12 repulsion, affecting ion doping efficiency. Moreover, larger OMIEC introduces a  
 13 larger contact area between the electrodes and channel, leading to smaller inject  
 14 resistance, which could also facilitate the injection of ions and negatively shifted  $V_{th}$   
 15 for n-type transistors or positively shifted  $V_{th}$  for p-type transistors.

16

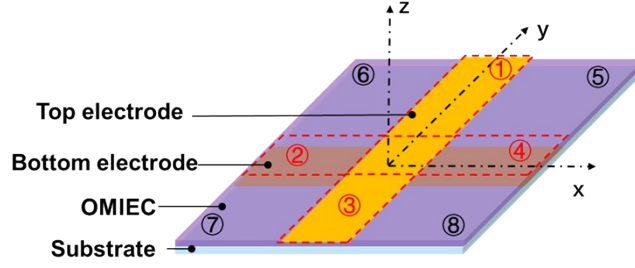

1

2 **Figure S6.** Schematic of a vOECT with redundant channel area and its spatial  
 3 coordinate system. Note that the model only considers the parts where OMIEC films  
 4 directly contacting electrodes (area 1-4), excluding the parts of 5-8.

5

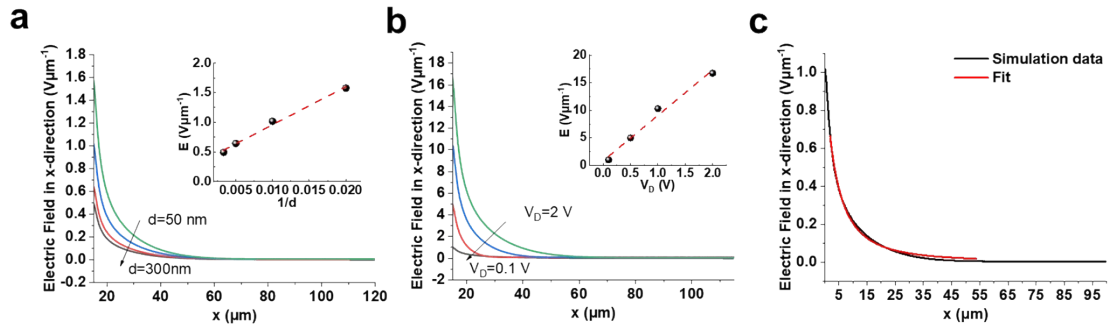

6

7 **Figure S7.** Simulation curves of the fringe electric field as a function of OMIEC  
 8 thickness  $d$  (a), source-drain voltage  $V_D$  (b), and the fitting curve with  $E_{fr} \propto x^{-2}$ .

9

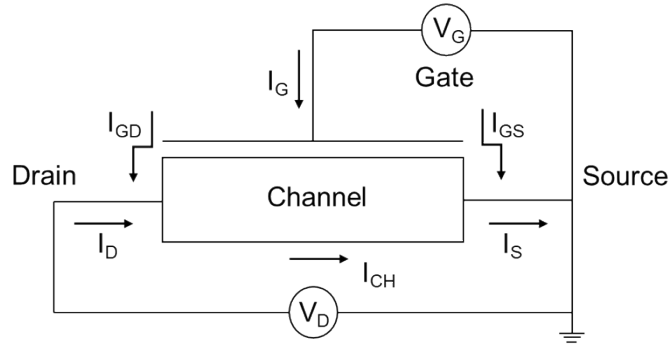

10

11 **Figure S8.** Circuit diagram describing the current discrete model of OECT.

12 It shows a circuit diagram of the discrete model with the gate current branches  $I_S$ ,  $I_D$ ,  
 13 and  $I_{CH}$ <sup>1</sup>. Based on this model, a dynamic model describing the source/drain current is  
 14 proposed.

15

$$i_D(t) = i_{CH}(t) - f i_G(t) \quad (1)$$

16

$$i_S(t) = -i_{CH}(t) - (1 - f) i_G(t) \quad (2)$$

1  $f$  is a weighting factor, supposed to be related to the bias at drain/gate terminals and  
 2 device symmetry<sup>2,3</sup>. At the off-state of vOECTs, pristine BBL exhibits the property of  
 3 an intrinsic semiconductor with a conductivity under  $10^{-12}$  S  $\text{cm}^{-1}$ .<sup>4</sup> In this case,  $I_{\text{CH}}$   
 4 contributes little to  $I_{\text{D}}$  but dominated by  $I_{\text{G}}$ . It suggests that the drain current at off-  
 5 state ( $I_{\text{off}}$ ) exhibits a similar trend to  $I_{\text{G}}$  as  $l_{\text{M}}$  increases regarding increasing parasitic  
 6 impedance.

7

8

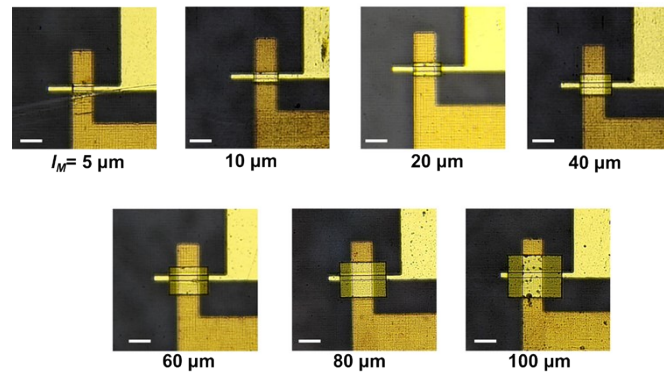

9

10 **Figure S9.** Microscopic images of the BBL-based vOECTs with 100  $\mu\text{m}$  wide top  
 11 electrodes (scale bar = 100  $\mu\text{m}$ ).

12

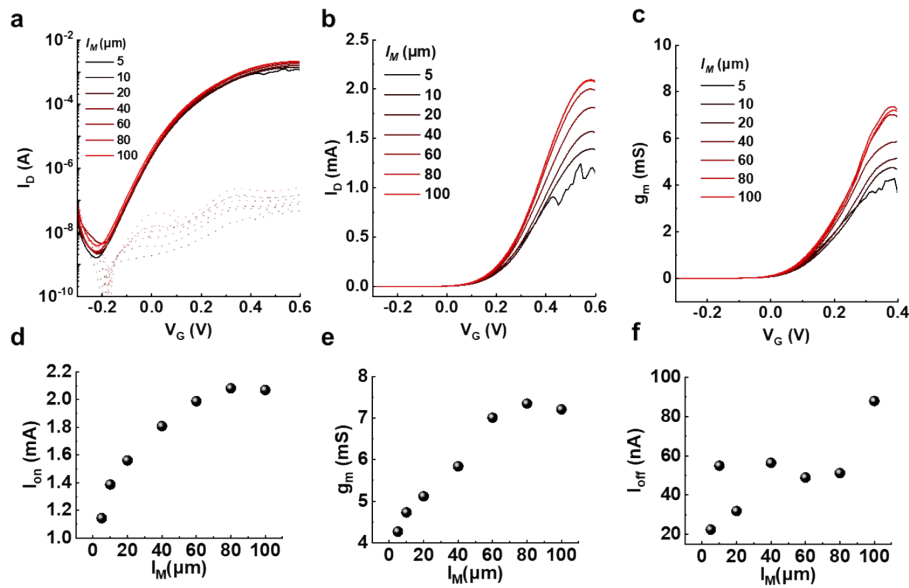

13

14 **Figure S10.** Transfer characteristics ( $V_{\text{D}} = 0.1$  V) in log-scale (a) and linear scale (b),  
 15 and plots of  $g_{\text{m}}$  (c) of BBL-based vOECTs with top electrode width of 100  $\mu\text{m}$ .  $I_{\text{on}}$  (d),

1  $g_m$  (e), and  $I_{off}$  (f) of the BBL-based vOECTs.  
2 BBL-based vOECTs with wider top electrodes ( $W_T = 100 \mu\text{m}$ ) are prepared (Figure  
3 S9). Transfer characteristics are performed along with the extraction of several key  
4 parameters, as shown in Figure S10. Compared to the vOECT with a top electrode  
5 width of approximately  $30 \mu\text{m}$ , the vOECT with a top electrode width of  $100 \mu\text{m}$   
6 exhibits about a threefold increase in  $I_{on}$  and  $g_m$ . As  $l_M$  increases from  $5 \mu\text{m}$  to  $100 \mu\text{m}$ ,  
7  $I_{on}$  and  $g_m$  of the vOECT increase from  $1.14 \text{ mA}$  and  $4.27 \text{ mS}$  to  $2.01 \text{ mA}$  and  $7.21$   
8  $\text{mS}$ , respectively. The parameters gradually reach a plateau as  $l_M$  increases to  $60 \mu\text{m}$ ,  
9 exhibiting a similar trend to the devices with the narrower top electrode. However,  
10 due to the larger area of top electrodes, the electrolyte-gold electrode contact area is  
11 significantly large.  $I_{off}$  is adversely affected due to additional parasitic impedance,  
12 resulting in high  $I_{off}$  at  $10^{-8}$ - $10^{-7} \text{ A}$ , which is an order of magnitude larger than the  
13 narrower top OECTs.  
14

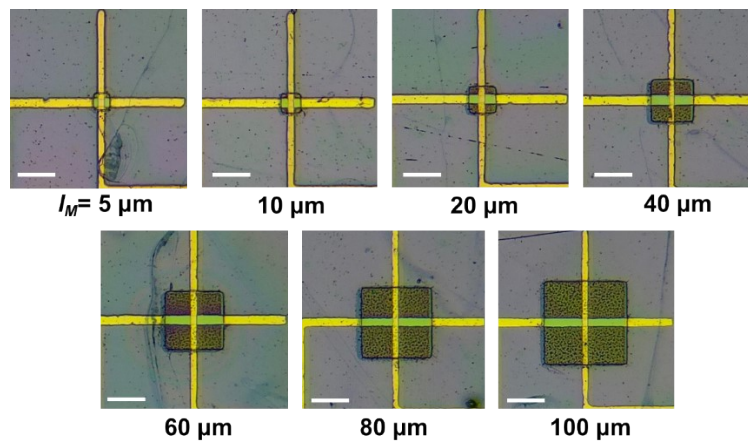

15  
16 **Figure S11.** Microscopic images of the gDPP-g2T-based vOECTs with different  
17 patterning precisions (scale bar =  $100 \mu\text{m}$ ).  
18  
19  
20

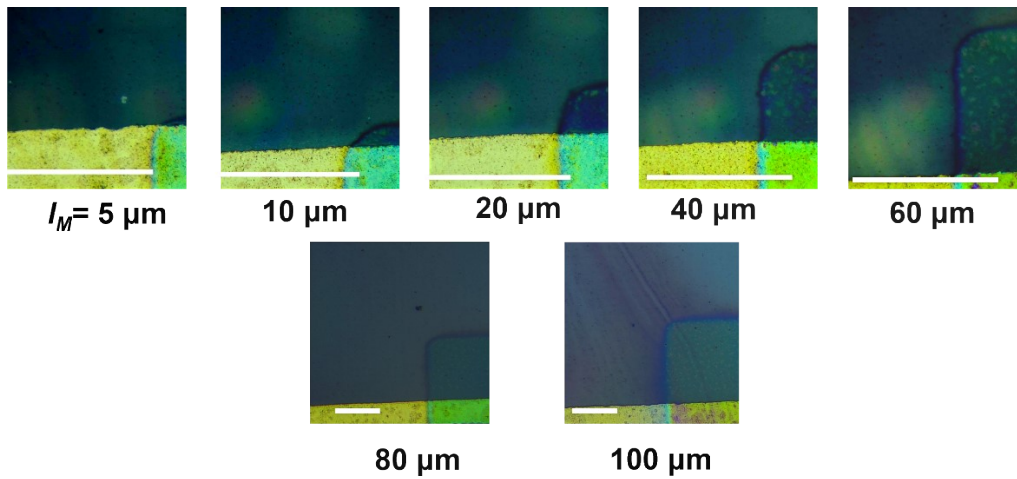

1  
 2 **Figure S12.** Microscopic images of the gDPP-g2T thin films with different patterning  
 3 precisions. (scale bar =50 μm)

4  
 5

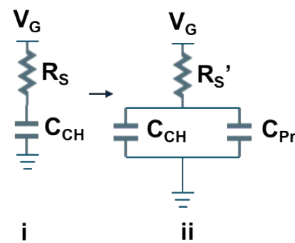

6  
 7 **Figure S13.** Ionic equivalent circuit of an ideal OECT (i) and an OECT with  
 8 considering its parasitic impedance (ii).

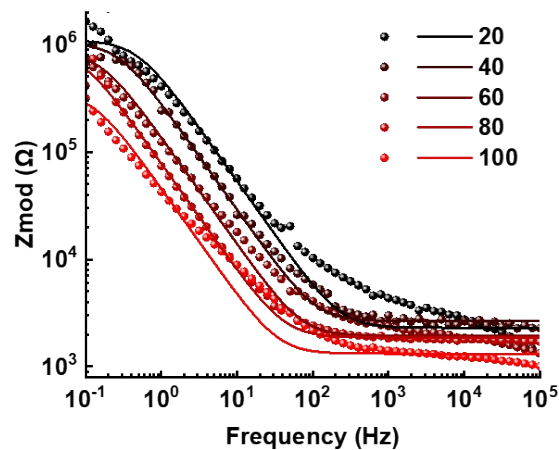

9  
 10 **Figure S14.** EIS curves of the n-type vOECTs with different  $l_M$  (See Experimental for  
 11 detailed measurement setup).

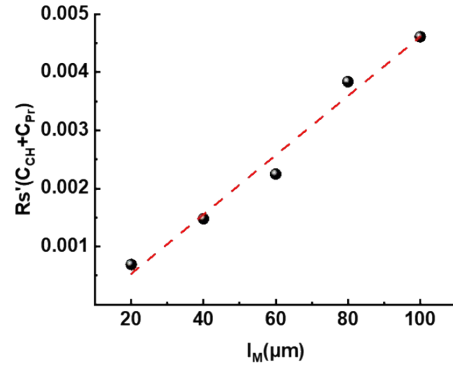

1

2 **Figure S15.** Plot of  $R_s'(C_{CH} + C_{Pr})$  as a function of  $l_M$  and the corresponding linear  
 3 fitting line.

4

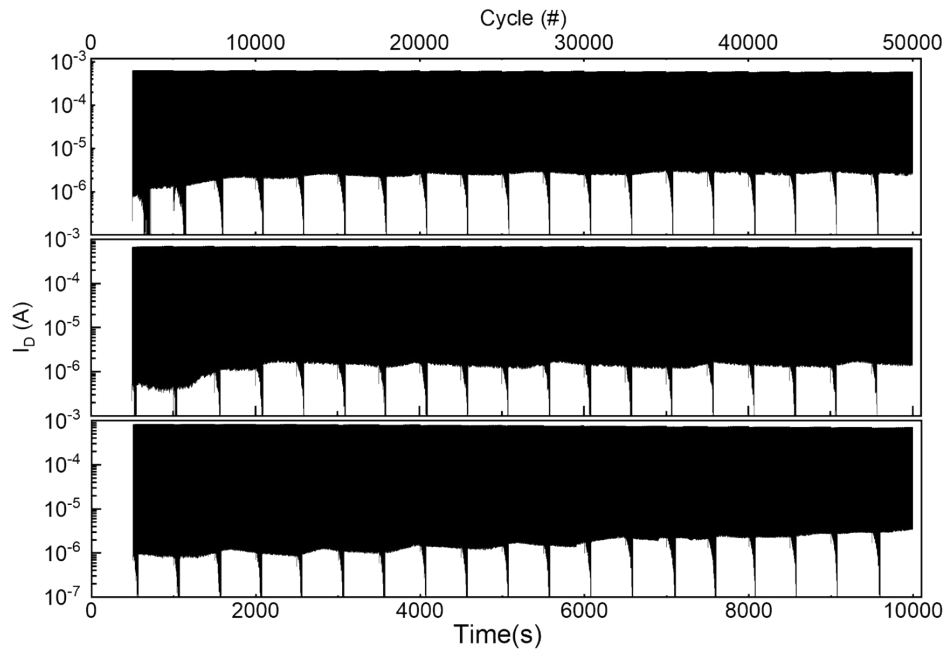

5

6 **Figure S16.** Cycling stability characteristics (after initializing cycles) of BBL-  
 7 vOECTs with  $l_M$  of 5, 40, and 100  $\mu\text{m}$ .



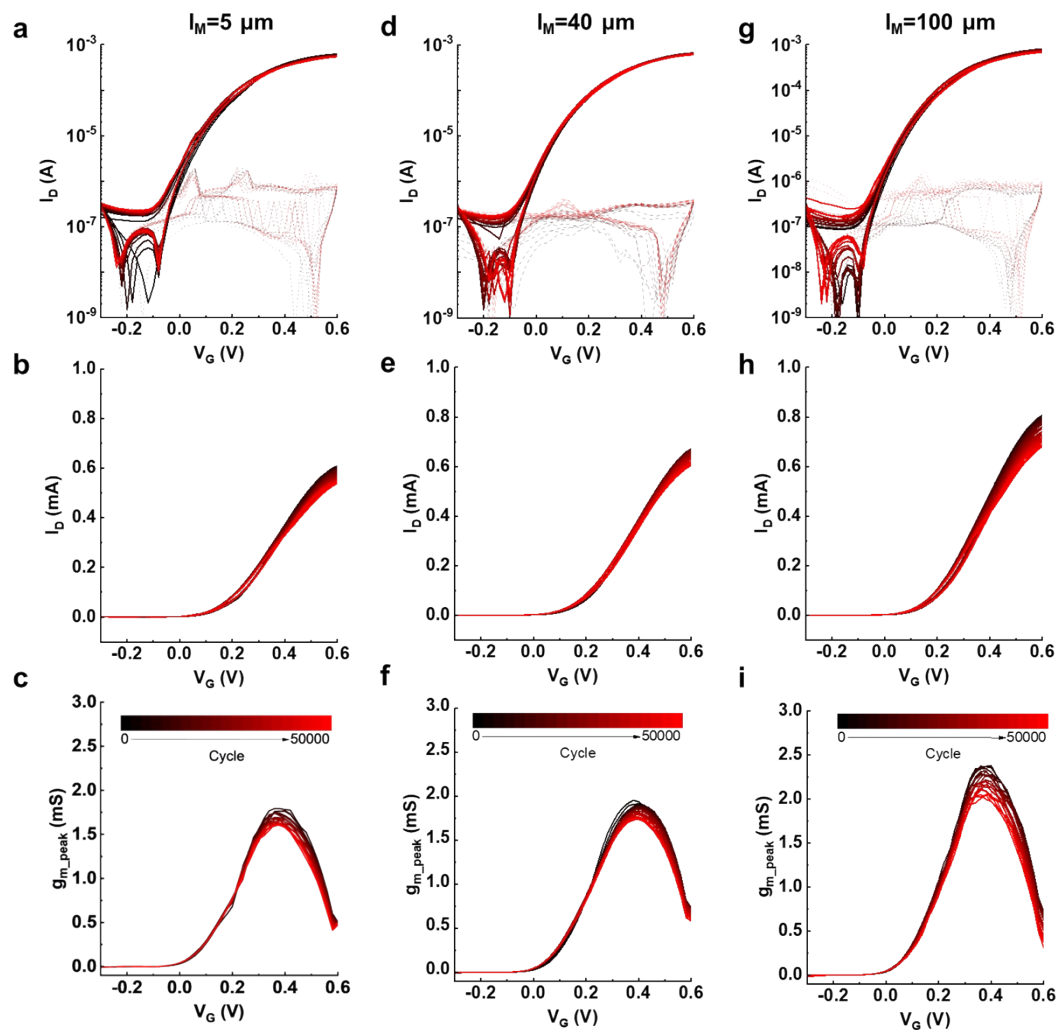

1

2 **Figure S17.** Transfer characteristics in log (a,d,g) and linear scale (b,e,h) and  
 3 transconductance plot (c,f,i) of BBL-vOECTs with  $l_M = 5 \mu\text{m}$  (a-c),  $40 \mu\text{m}$  (d-f) and  
 4  $100 \mu\text{m}$  (g-i), respectively, during the cycling stability characteristics.

5

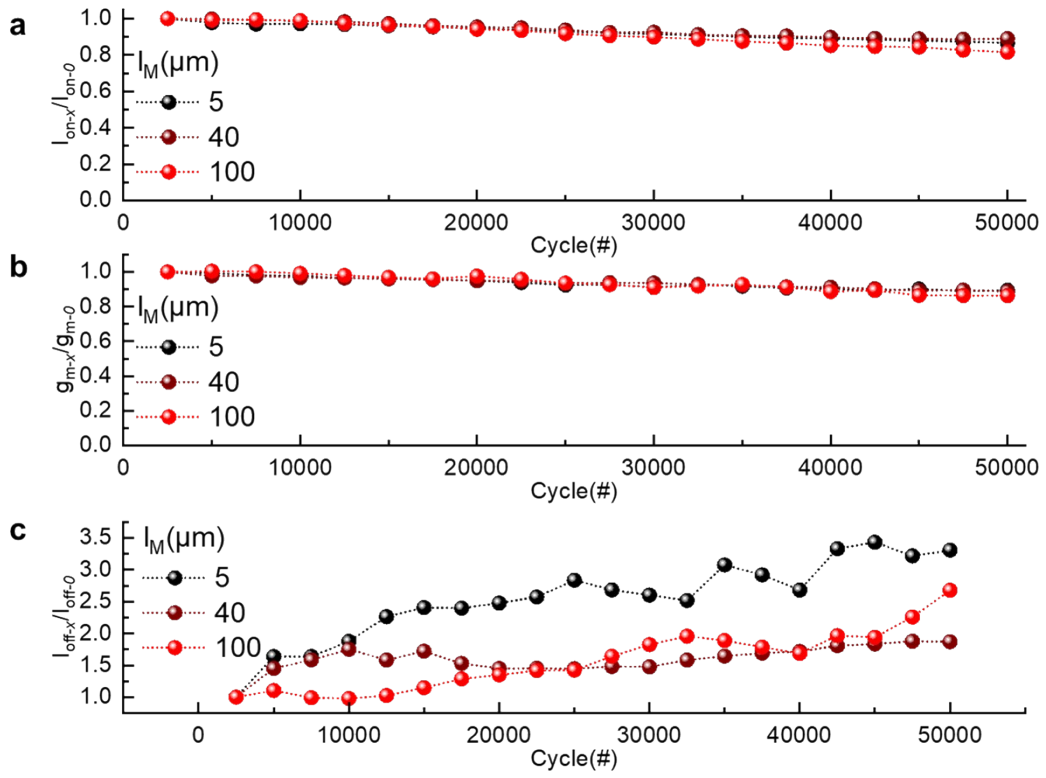

1

2 **Figure S18.** Decay trends of (a)  $I_{on}$ , (b)  $g_{m\_peak}$  and (c)  $I_{off}$  during cycling  
 3 characterizations.

4

1 **Supplementary Tables**

2 **Table S1. The thickness of BBL and gDPP-g2T thin films**

|             |              | $l_M$ ( $\mu\text{m}$ ) |            |            |            |            |            |            |            |
|-------------|--------------|-------------------------|------------|------------|------------|------------|------------|------------|------------|
|             |              | 2                       | 5          | 10         | 20         | 40         | 60         | 80         | 100        |
| <b>Thi</b>  | <b>gDP</b>   | /                       | 124.41     | 125.73     | 124.42     | 123.21     | 123.98     | 124.53     | 125.24     |
|             | <b>P-g2T</b> |                         | $\pm 2.63$ | $\pm 1.06$ | $\pm 2.02$ | $\pm 2.20$ | $\pm 2.68$ | $\pm 3.25$ | $\pm 1.56$ |
| <b>ck-</b>  | <b>BBL</b>   | 107.                    | 106.80     | 106.79     | 106.68     | 107.32     | 107.63     | 107.58     | 107.26     |
| <b>ness</b> |              | $17 \pm 2$              | $\pm 0.52$ | $\pm 0.50$ | $\pm 1.10$ | $\pm 1.89$ | $\pm 1.28$ | $\pm 2.32$ | $\pm 1.92$ |
| <b>(nm</b>  |              | .20                     |            |            |            |            |            |            |            |
| <b>)</b>    |              |                         |            |            |            |            |            |            |            |

3

4 **Table S2. Parameters for simulations**

|                   | <b>Parameters</b>    | <b>Values</b>                             | <b>Reference</b> |
|-------------------|----------------------|-------------------------------------------|------------------|
| Configuratio<br>n | Electrode            | 30 $\mu\text{m}$                          | -                |
|                   | Overlap              |                                           | -                |
|                   | Permittivity         | 8.3                                       | 5                |
|                   | Band gap             | 1.8 eV                                    | 6                |
|                   | Work function        | 4.3 eV                                    | 6                |
| BBL               | Electron<br>mobility | $2.2 \times 10^{-2} \text{cm}^2/\text{V}$ | 6                |
|                   | Bandgap<br>narrowing | None                                      | -                |
|                   | Temperature          | 300 K                                     | -                |
| Environment       | Ambient              | Air                                       | -                |

5 The distribution of the fringe electric field was obtained by using Lumerical Charge  
6 simulations. Table S1 shows the device configuration, environment, and BBL  
7 material parameters, along with relevant references.

8

## 1 References

- 2 1. Friedlein, J. T.; Donahue, M. J.; Shaheen, S. E.; Malliaras, G. G.; McLeod, R.  
3 R., Microsecond Response in Organic Electrochemical Transistors: Exceeding the  
4 Ionic Speed Limit. *Advanced Materials* **2016**, *28* (38), 8398-8404.
- 5 2. Faria, G. C.; Duong, D. T.; Salleo, A., On the transient response of organic  
6 electrochemical transistors. *Organic Electronics* **2017**, *45*, 215-221.
- 7 3. Friedlein, J. T.; McLeod, R. R.; Rivnay, J., Device physics of organic  
8 electrochemical transistors. *Organic Electronics* **2018**, *63*, 398-414.
- 9 4. Fazzi, D.; Negri, F., Addressing the Elusive Polaronic Nature of Multiple Redox  
10 States in a  $\pi$ -Conjugated Ladder-Type Polymer. *Advanced Electronic Materials* **2021**,  
11 *7* (1), 2000786.
- 12 5. Kraner, S.; Koerner, C.; Leo, K.; Bittrich, E.; Eichhorn, K. J.; Karpov, Y.;  
13 Kiriya, A.; Stamm, M.; Hinrichs, K.; Al-Hussein, M., Dielectric function of a  
14 poly(benzimidazobenzophenanthroline) ladder polymer. *Physical Review B* **2015**, *91*  
15 (19), 195202.
- 16 6. Kim, F. S.; Park, C. H.; Na, Y.; Jenekhe, S. A., Effects of ladder structure on the  
17 electronic properties and field-effect transistor performance of  
18 Poly(benzobisimidazobenzophenanthroline). *Organic Electronics* **2019**, *69*, 301-307.
- 19
